# Supplementary material for: Identifying Factors Which Influence Eating Disorder Risk during Behavioral Weight Management: A Consensus Study
Source: MDPI journal article supplement (doi:10.3390/nu15051085), 2023-02-22
Supplement: s1 [file s1]

**Table S1: Individual participant characteristics**

| <b>Individual characteristics (n=87)</b>                                                                          |                                     |                                |                                       |                              |                                   |                 |
|-------------------------------------------------------------------------------------------------------------------|-------------------------------------|--------------------------------|---------------------------------------|------------------------------|-----------------------------------|-----------------|
|                                                                                                                   | <b>N (%)</b>                        |                                |                                       |                              |                                   |                 |
|                                                                                                                   | <b>Very unlikely to be relevant</b> | <b>Unlikely to be relevant</b> | <b>Somewhat likely to be relevant</b> | <b>Likely to be relevant</b> | <b>Very likely to be relevant</b> | <b>Not sure</b> |
| <b>Participant demographics</b> e.g. age, sex, ethnicity, socio-economic status, family structure and environment | 3 (3)                               | 3 (3)                          | 16 (18)                               | 23 (26)                      | 39 (45)                           | 3 (3)           |
| <b>Weight status or classification</b> e.g. BMI, BMI z-score, BMI percentile, overweight, obesity                 | 7 (8)                               | 11 (13)                        | 11 (13)                               | 18 (21)                      | 37 (43)                           | 3 (3)           |
| <b>General medical history (excluding mental health) (n=87)</b>                                                   |                                     |                                |                                       |                              |                                   |                 |
| Age at menarche                                                                                                   | 8 (9)                               | 5 (6)                          | 26 (30)                               | 34 (39)                      | 7 (8)                             | 7 (8)           |
| Age at menopause                                                                                                  | 11 (13)                             | 19 (22)                        | 17 (20)                               | 19 (22)                      | 5 (6)                             | 16 (18)         |
| Medical history e.g., type 2 diabetes, diet-related chronic disease                                               | 1 (1)                               | 11 (13)                        | 24 (28)                               | 30 (35)                      | 19 (22)                           | 2 (2)           |
| Family history e.g., type 2 diabetes, diet-related chronic disease                                                | 1 (1)                               | 13 (15)                        | 29 (33)                               | 24 (28)                      | 15 (17)                           | 5 (6)           |
| Medication history -general                                                                                       | 4 (5)                               | 15 (17)                        | 24 (28)                               | 28 (32)                      | 4 (5)                             | 12 (14)         |
| Medication history - those known to effect body weight                                                            | 2 (2)                               | 3 (3)                          | 15 (17)                               | 34 (39)                      | 28 (32)                           | 5 (6)           |
| Family history of bariatric surgery                                                                               | 1 (1)                               | 6 (7)                          | 15 (17)                               | 33 (38)                      | 27 (31)                           | 5 (6)           |
| <b>Weight-related medical history (n=84)</b>                                                                      |                                     |                                |                                       |                              |                                   |                 |
| Family history of obesity                                                                                         | 2 (2)                               | 1 (1)                          | 9 (11)                                | 31 (37)                      | 39 (46)                           | 2 (2)           |
| Recent weight loss prior to intervention                                                                          | 0 (0)                               | 6 (7)                          | 12 (14)                               | 30 (36)                      | 33 (39)                           | 3 (4)           |
| Age of onset of obesity/ weight history                                                                           | 2 (2)                               | 4 (5)                          | 9 (11)                                | 29 (35)                      | 35 (42)                           | 5 (6)           |
| Life events which may impact upon body weight e.g. pregnancy, smoking cessation                                   | 1 (1)                               | 6 (7)                          | 12 (14)                               | 32 (38)                      | 27 (32)                           | 6 (7)           |
| <b>Eating disorder-related medical history (n=84)</b>                                                             |                                     |                                |                                       |                              |                                   |                 |
| History of an eating disorder (current, previous)                                                                 | 0 (0)                               | 1 (1)                          | 2 (2)                                 | 7 (8)                        | 74 (88)                           | 0 (0)           |
| History of eating disorder treatment                                                                              | 1 (1)                               | 1 (1)                          | 3 (4)                                 | 14 (17)                      | 65 (77)                           | 0 (0)           |
| Family history of eating disorder                                                                                 | 1 (1)                               | 1 (1)                          | 4 (5)                                 | 15 (18)                      | 63 (75)                           | 0 (0)           |
| <b>Mental health-related medical history (n=83)</b>                                                               |                                     |                                |                                       |                              |                                   |                 |
| Diagnosis of anxiety or depression                                                                                | 0 (0)                               | 3 (4)                          | 6 (7)                                 | 29 (35)                      | 44 (53)                           | 1 (1)           |
| Trauma (including adverse childhood experience, trauma during adulthood)                                          | 0 (0)                               | 3 (4)                          | 1 (1)                                 | 22 (27)                      | 57 (69)                           | 0 (0)           |
| Diagnosis of oppositional defiant disorder (ODD)                                                                  | 5 (6)                               | 14 (17)                        | 11 (13)                               | 12 (15)                      | 14 (17)                           | 27 (33)         |
| Diagnosis of attention deficit hyperactivity disorder (ADHD)                                                      | 3 (4)                               | 7 (8)                          | 19 (23)                               | 17 (21)                      | 19 (23)                           | 18 (22)         |
| Diagnosis of obsessive compulsive disorder (OCD)                                                                  | 2 (2)                               | 3 (4)                          | 7 (8)                                 | 27 (33)                      | 39 (47)                           | 5 (6)           |
| Diagnosis of autism spectrum disorder (ASD)                                                                       | 2 (2)                               | 8 (10)                         | 18 (22)                               | 18 (22)                      | 20 (24)                           | 17 (21)         |
| Personality traits e.g. perfectionism, obsessionality, impulsivity, unrelenting standards                         | 1 (1)                               | 2 (2)                          | 1 (1)                                 | 21 (25)                      | 56 (68)                           | 2 (2)           |

| Psychosocial health at treatment outset (n=83)                                                                         |       |         |         |         |         |       |
|------------------------------------------------------------------------------------------------------------------------|-------|---------|---------|---------|---------|-------|
| Self-esteem                                                                                                            | 1 (1) | 2 (2)   | 8 (10)  | 18 (22) | 53 (64) | 1 (1) |
| Body dissatisfaction                                                                                                   | 0 (0) | 1 (1)   | 4 (5)   | 8 (10)  | 69 (83) | 1 (1) |
| Weight-bias internalisation                                                                                            | 0 (0) | 1 (1)   | 2 (2)   | 11 (13) | 68 (82) | 1 (1) |
| Weight-based teasing/bullying/<br>stigma/discrimination                                                                | 0 (0) | 1 (1)   | 2 (2)   | 9 (11)  | 70 (84) | 1 (1) |
| Weight-talk (peer/family)                                                                                              | 0 (0) | 1 (1)   | 6 (7)   | 15 (18) | 59 (71) | 2 (2) |
| Quality of life/ weight-related quality of<br>life                                                                     | 0 (0) | 1 (1)   | 8 (10)  | 23 (28) | 49 (59) | 2 (2) |
| Stress                                                                                                                 | 0 (0) | 2 (2)   | 15 (18) | 23 (28) | 42 (51) | 1 (1) |
| Social support (family support/ peer<br>support)                                                                       | 0 (0) | 2 (2)   | 15 (18) | 26 (31) | 38 (46) | 2 (2) |
| Eating behaviours at treatment (n=80)                                                                                  |       |         |         |         |         |       |
| Disinhibition related to eating                                                                                        | 5 (6) | 2 (3)   | 5 (6)   | 25 (31) | 37 (46) | 6 (8) |
| Impulsivity related to eating                                                                                          | 3 (4) | 2 (3)   | 6 (8)   | 21 (26) | 46 (58) | 2 (2) |
| Emotional eating                                                                                                       | 4 (5) | 4 (5)   | 6 (8)   | 18 (23) | 47 (59) | 1 (1) |
| Binge eating                                                                                                           | 2 (3) | 2 (3)   | 1 (1)   | 17 (21) | 57 (71) | 1 (1) |
| Loss of control eating                                                                                                 | 2 (3) | 2 (3)   | 2 (3)   | 15 (19) | 58 (73) | 1 (1) |
| Self-efficacy towards eating                                                                                           | 3 (4) | 3 (4)   | 8 (10)  | 27 (34) | 35 (44) | 4 (5) |
| Night eating                                                                                                           | 3 (4) | 4 (5)   | 11 (14) | 24 (30) | 36 (45) | 2 (3) |
| Grazing                                                                                                                | 5 (6) | 17 (21) | 22 (28) | 15 (19) | 18 (23) | 3 (4) |
| External eating/food responsiveness<br>(i.e., eating in response to external<br>cues)                                  | 5 (6) | 9 (11)  | 10 (13) | 18 (23) | 34 (43) | 4 (5) |
| Secret eating                                                                                                          | 2 (3) | 2 (3)   | 2 (3)   | 16 (20) | 57 (71) | 1 (1) |
| Family history or current food insecurity<br>or deprivation                                                            | 1 (1) | 2 (3)   | 10 (13) | 18 (23) | 46 (58) | 3 (4) |
| Narrow range/limited food choices or<br>acceptability (including food rules,<br>limited access to foods, fussy eating) | 0 (0) | 1 (1)   | 11 (14) | 22 (28) | 43 (54) | 3 (4) |
| History of dieting (n=80)                                                                                              |       |         |         |         |         |       |
| Level of dietary restraint/restriction                                                                                 | 0 (0) | 3 (4)   | 5 (6)   | 16 (20) | 55 (69) | 1 (1) |
| Previous dieting under professional<br>supervision                                                                     | 3 (4) | 9 (11)  | 16 (20) | 19 (24) | 32 (40) | 1 (1) |
| Previous self-directed dieting                                                                                         | 0 (0) | 2 (3)   | 13 (16) | 18 (23) | 46 (58) | 1 (1) |
| Type of diet followed during dieting                                                                                   | 1 (1) | 7 (9)   | 9 (11)  | 21 (26) | 41 (51) | 1 (1) |
| Duration of dieting                                                                                                    | 2 (3) | 4 (5)   | 11 (14) | 19 (24) | 43 (54) | 1 (1) |
| Number of previous dieting attempts                                                                                    | 2 (3) | 4 (5)   | 8 (10)  | 17 (21) | 47 (59) | 2 (3) |
| Age of onset of dieting                                                                                                | 1 (1) | 2 (3)   | 6 (8)   | 20 (25) | 49 (61) | 2 (3) |

## Part 2: Weight Management Strategy Interventions

**Table S2.1. Category 1: Framing of the Intervention**

| Intent/overarching goal of the weight management intervention (n=71) |                                                          |                                        |                                         |                                        |                                                          |             |
|----------------------------------------------------------------------|----------------------------------------------------------|----------------------------------------|-----------------------------------------|----------------------------------------|----------------------------------------------------------|-------------|
|                                                                      | N (%)                                                    |                                        |                                         |                                        |                                                          |             |
|                                                                      | Very likely to<br>decrease risk<br>of eating<br>disorder | Somewhat<br>likely to<br>decrease risk | No impact<br>on eating<br>disorder risk | Somewhat<br>likely to<br>increase risk | Very likely to<br>increase risk<br>of eating<br>disorder | Not<br>sure |

|                                                                                                               |         |         |           |         |         |       |
|---------------------------------------------------------------------------------------------------------------|---------|---------|-----------|---------|---------|-------|
| Aims for weight maintenance but not weight loss                                                               | 3 (4)   | 19 (27) | 11 (15.5) | 18 (25) | 18 (25) | 2 (3) |
| Aims for weight loss                                                                                          | 3 (4)   | 1 (1)   | 7 (10)    | 21 (30) | 38 (54) | 1 (1) |
| Does not focus on weight in any way, focus on health improvement e.g. a weight-neutral intervention           | 26 (37) | 25 (35) | 10 (14)   | 6 (9)   | 2 (3)   | 2 (3) |
| <b>Framing of the intervention (communication strategies) (n=71)</b>                                          |         |         |           |         |         |       |
| Education provided on obesity as a disease                                                                    | 3 (4)   | 20 (28) | 6 (9)     | 17 (24) | 23 (32) | 2 (3) |
| Education that weight loss is required to improve health outcomes                                             | 1 (1)   | 11 (16) | 5 (7)     | 21 (30) | 31 (44) | 2 (9) |
| Education that health outcomes are not dependent on weight                                                    | 19 (27) | 33 (47) | 10 (14)   | 2 (3)   | 2 (3.0) | 5 (7) |
| Use of weight-focused language during the intervention (e.g., weight loss, weight management, weight control) | 0 (0)   | 6 (9)   | 9 (13)    | 18 (25) | 35 (49) | 3 (4) |
| Feedback on change in metabolic health outcomes (e.g., insulin sensitivity, cholesterol levels)               | 8 (11)  | 22 (31) | 19 (27)   | 12 (17) | 4 (6)   | 6 (9) |
| <b>Outcome related strategies (n=69)</b>                                                                      |         |         |           |         |         |       |
| Measures weight/ adiposity as an outcome e.g. weight, waist circumference, body composition                   | 1 (1)   | 4 (6)   | 6 (9)     | 25 (36) | 32 (46) | 1 (1) |
| Measures a range of health outcomes e.g. blood pressure, blood test, fitness                                  | 7 (10)  | 23 (33) | 14 (20)   | 15 (22) | 5 (7)   | 5 (7) |
| Measures mental health outcomes e.g. depression                                                               | 12 (17) | 31 (45) | 10 (15)   | 7 (10)  | 7 (10)  | 2 (3) |
| Encourages weight focused goals                                                                               | 1 (1)   | 3 (4)   | 4 (6)     | 18 (26) | 42 (61) | 1 (1) |
| Discourages weight-focused goals (instead focused on health-related goals)                                    | 17 (25) | 32 (46) | 10 (15)   | 8 (12)  | 1 (1)   | 1 (1) |
| Feedback on weight change during the intervention                                                             | 2 (3)   | 4 (6)   | 10 (15)   | 18 (26) | 30 (44) | 5 (7) |
| Feedback on other measures of weight adiposity (e.g. body composition, waist circumference)                   | 3 (4)   | 10 (15) | 9 (13)    | 13 (19) | 30 (44) | 4 (6) |
| Promotes weight loss rewards or incentives                                                                    | 2 (3)   | 2 (3)   | 6 (9)     | 15 (22) | 43 (62) | 1 (1) |
| <b>Measurement of weight (n=69)</b>                                                                           |         |         |           |         |         |       |
| Individual weighing at visits                                                                                 | 1 (1)   | 6 (9)   | 8 (12)    | 20 (29) | 34 (49) | 0 (0) |
| Blind weighing at visits                                                                                      | 5 (7)   | 13 (19) | 16 (23)   | 20 (29) | 11 (16) | 4 (6) |
| Group weighing                                                                                                | 1 (1)   | 1 (1)   | 1 (1)     | 17 (25) | 48 (70) | 1 (1) |
| Encourages self-monitoring of weight (e.g. self-weighing at home)                                             | 0 (0)   | 6 (9)   | 9 (13)    | 16 (23) | 37 (54) | 1 (1) |

|                                                                                        |        |         |         |       |       |       |
|----------------------------------------------------------------------------------------|--------|---------|---------|-------|-------|-------|
| Discourages home weighing or frequent weighing                                         | 6 (9)  | 36 (52) | 17 (25) | 2 (3) | 5 (7) | 3 (4) |
| Communication about the ability to decline weight or opt out of weighing during visits | 8 (12) | 33 (48) | 16 (23) | 4 (6) | 4 (6) | 4 (6) |

**Table S2.2. Category 2: Dietary strategies**

| <b>Nutrition education (n=64)</b>                                                                                                                                                                                                                  |                                                        |                                         |                                          |                                         |                                                        |                 |
|----------------------------------------------------------------------------------------------------------------------------------------------------------------------------------------------------------------------------------------------------|--------------------------------------------------------|-----------------------------------------|------------------------------------------|-----------------------------------------|--------------------------------------------------------|-----------------|
|                                                                                                                                                                                                                                                    | <b>N (%)</b>                                           |                                         |                                          |                                         |                                                        |                 |
|                                                                                                                                                                                                                                                    | <b>Very likely to decrease risk of eating disorder</b> | <b>Somewhat likely to decrease risk</b> | <b>No impact on eating disorder risk</b> | <b>Somewhat likely to increase risk</b> | <b>Very likely to increase risk of eating disorder</b> | <b>Not sure</b> |
| Education on portion size (e.g. portion plate model)                                                                                                                                                                                               | 3 (5)                                                  | 10 (16)                                 | 15 (23)                                  | 21 (33)                                 | 13 (20)                                                | 2 (3)           |
| Education on label reading                                                                                                                                                                                                                         | 3 (5)                                                  | 8 (13)                                  | 16 (25)                                  | 19 (30)                                 | 16 (25)                                                | 2 (3)           |
| Education on metabolism                                                                                                                                                                                                                            | 8 (13)                                                 | 20 (31)                                 | 17 (27)                                  | 10 (16)                                 | 7 (11)                                                 | 2 (3)           |
| Education on healthy eating guide (e.g. promotes balanced meals and food groups)                                                                                                                                                                   | 8 (13)                                                 | 21 (33)                                 | 18 (28)                                  | 10 (16)                                 | 6 (9)                                                  | 1 (2)           |
| Education on energy/macronutrient (e.g. fat, sugar) content of foods                                                                                                                                                                               | 6 (10)                                                 | 5 (8)                                   | 14 (22)                                  | 25 (39)                                 | 13 (20)                                                | 1 (2)           |
| Categorisation of foods (e.g. traffic light system; increase certain foods such as fruit and vegetables; reduce/limit certain foods such as alcohol, high energy, high fat, high sugar; defines foods as good vs bad (e.g. treat/ sometimes foods) | 5 (8)                                                  | 4 (6)                                   | 4 (6)                                    | 21 (33)                                 | 30 (47)                                                | 0 (0)           |
| Provides cultural adaptations relating to diet                                                                                                                                                                                                     | 8 (13)                                                 | 19 (30)                                 | 26 (41)                                  | 5 (8)                                   | 4 (6)                                                  | 2 (3)           |
| <b>Dietary monitoring (n=64)</b>                                                                                                                                                                                                                   |                                                        |                                         |                                          |                                         |                                                        |                 |
| Dietary monitoring – food based (e.g. food diary, points system)                                                                                                                                                                                   | 3 (5)                                                  | 3 (5)                                   | 7 (11)                                   | 15 (23)                                 | 34 (53)                                                | 2 (3)           |
| Dietary monitoring – energy based (e.g. calorie counting)                                                                                                                                                                                          | 2 (3)                                                  | 2 (3)                                   | 1 (2)                                    | 16 (25)                                 | 42 (66)                                                | 1 (2)           |
| Review/feedback on self-monitoring (e.g., feedback on food diary)                                                                                                                                                                                  | 3 (5)                                                  | 7 (11)                                  | 8 (13)                                   | 13 (20)                                 | 25 (39)                                                | 8 (13)          |
| <b>Dietary prescription (n=64)</b>                                                                                                                                                                                                                 |                                                        |                                         |                                          |                                         |                                                        |                 |
| Hypocaloric diet (reduced calorie diet)                                                                                                                                                                                                            | 1 (2)                                                  | 3 (5)                                   | 5 (8)                                    | 13 (20)                                 | 41 (64)                                                | 1 (2)           |
| Traffic light diet (categorising foods as red, yellow, green)                                                                                                                                                                                      | 2 (3)                                                  | 6 (9)                                   | 4 (6)                                    | 22 (34)                                 | 29 (45)                                                | 1 (2)           |
| Intermittent energy restriction/ intermittent fasting (chrononutrition)                                                                                                                                                                            | 1 (2)                                                  | 2 (3)                                   | 6 (9)                                    | 7 (11)                                  | 45 (70)                                                | 3 (5)           |
| Macronutrient prescription (e.g. low-carbohydrate, high-protein)                                                                                                                                                                                   | 3 (5)                                                  | 1 (2)                                   | 8 (13)                                   | 16 (25)                                 | 33 (52)                                                | 3 (5)           |

|                                                                                                                               |         |         |         |         |         |        |
|-------------------------------------------------------------------------------------------------------------------------------|---------|---------|---------|---------|---------|--------|
| Ketogenic diet                                                                                                                | 1 (2)   | 2 (3)   | 5 (8)   | 12 (19) | 36 (56) | 8 (13) |
| Moderate energy restriction<br>(moderate calorie restriction)                                                                 | 3 (5)   | 5 (8)   | 7 (11)  | 21 (33) | 26 (41) | 2 (3)  |
| Very low energy diet (VLED/<br>VLCD - restrictive calorie<br>restriction e.g. 800-1000 kcal/<br>day)                          | 0 (0)   | 3 (8)   | 3 (5)   | 9 (14)  | 46 (72) | 3 (5)  |
| <b>Delivery of the dietary intervention (n=64)</b>                                                                            |         |         |         |         |         |        |
| Prescriptive/ specific meal plan<br>(external control)                                                                        | 3 (5)   | 4 (6)   | 5 (8)   | 18 (28) | 30 (47) | 4 (6)  |
| Flexible meal plan (provides<br>choice, ownership over dietary<br>intake)                                                     | 12 (19) | 27 (42) | 8 (13)  | 8 (13)  | 7 (11)  | 2 (3)  |
| Use of meal replacement<br>products – partial or full                                                                         | 2 (3)   | 5 (8)   | 9 (14)  | 21 (33) | 23 (36) | 4 (6)  |
| Promotes ‘free’ foods, ad-lib<br>intake of certain foods                                                                      | 2 (3)   | 13 (20) | 7 (11)  | 16 (25) | 19 (30) | 7 (11) |
| Individual approach to dietary<br>change                                                                                      | 15 (23) | 28 (44) | 7 (11)  | 6 (9)   | 7 (11)  | 1 (2)  |
| Family-oriented approach to<br>dietary change                                                                                 | 14 (22) | 27 (42) | 4 (6)   | 8 (13)  | 8 (13)  | 3 (5)  |
| <b>Dietary behaviour change strategies (n=63)</b>                                                                             |         |         |         |         |         |        |
| Problem solving barriers to<br>dietary change                                                                                 | 10 (16) | 26 (41) | 7 (11)  | 7 (11)  | 6 (10)  | 7 (11) |
| Feedback on dietary behaviours<br>(e.g. diet history at visits)                                                               | 6 (10)  | 13 (21) | 12 (19) | 14 (22) | 13 (21) | 5 (8)  |
| Encourages dietary focused goals<br>with/ without review                                                                      | 3 (5)   | 14 (22) | 16 (25) | 14 (22) | 9 (14)  | 7 (11) |
| Shopping support (planning,<br>product choice, family/ partner<br>involvement in food purchases)                              | 11 (18) | 20 (32) | 14 (22) | 6 (10)  | 7 (11)  | 5 (8)  |
| Addresses home/food<br>environment (e.g. identifying<br>triggers, permissive vs restrictive<br>environment; stimulus control) | 12 (19) | 30 (48) | 5 (8)   | 6 (10)  | 8 (13)  | 2 (3)  |
| Addresses food/meal<br>preparation skills (e.g. cooking<br>demonstrations, recipes)                                           | 10 (16) | 29 (46) | 12 (19) | 3 (5)   | 7 (11)  | 2 (3)  |

**Table S2.3. Category 3: Eating behaviors/disordered eating**

| <b>Addresses disordered eating (n=63)</b>                                                                                                                      |                                                                    |                                                 |                                                  |                                                 |                                                                    |                     |
|----------------------------------------------------------------------------------------------------------------------------------------------------------------|--------------------------------------------------------------------|-------------------------------------------------|--------------------------------------------------|-------------------------------------------------|--------------------------------------------------------------------|---------------------|
|                                                                                                                                                                | <b>N (%)</b>                                                       |                                                 |                                                  |                                                 |                                                                    |                     |
|                                                                                                                                                                | <b>Very likely to<br/>decrease risk<br/>of eating<br/>disorder</b> | <b>Somewhat<br/>likely to<br/>decrease risk</b> | <b>No impact on<br/>eating<br/>disorder risk</b> | <b>Somewhat<br/>likely to<br/>increase risk</b> | <b>Very likely to<br/>increase risk<br/>of eating<br/>disorder</b> | <b>Not<br/>sure</b> |
| Identifies disordered eating<br>behaviours (e.g. binge eating,<br>emotional eating, secret eating,<br>guilt related to eating, loss of<br>control over eating) | 19 (30)                                                            | 26 (41)                                         | 8 (13)                                           | 2 (3)                                           | 7 (11)                                                             | 1 (2)               |

|                                                                                                                                                                                         |         |         |        |       |        |       |
|-----------------------------------------------------------------------------------------------------------------------------------------------------------------------------------------|---------|---------|--------|-------|--------|-------|
| Explores individual underlying causes/ drivers of disordered eating (e.g. teasing/ bullying, trauma, body image disturbance/pre-occupation with weight and shape, emotional regulation) | 27 (43) | 25 (40) | 5 (8)  | 1 (2) | 4 (6)  | 1 (2) |
| Addresses disordered eating behaviours (e.g. identifying triggers, strategies to prevent emotional eating)                                                                              | 31 (49) | 19 (30) | 2 (3)  | 2 (3) | 7 (11) | 2 (3) |
| <b>Promotes healthful/ helpful eating behaviours (n=63)</b>                                                                                                                             |         |         |        |       |        |       |
| Promotes mealtime routines (e.g. regular meals, avoid meal skipping)                                                                                                                    | 23 (37) | 31 (49) | 2 (3)  | 2 (3) | 5 (8)  | 0 (0) |
| Promotes meal time support (e.g. support while eating, family meals, social eating)                                                                                                     | 18 (29) | 32 (51) | 6 (10) | 1 (2) | 5 (8)  | 1 (2) |
| Encourages mindful eating principles or practice (e.g. avoiding distractions while eating)                                                                                              | 21 (33) | 26 (41) | 9 (14) | 2 (3) | 4 (6)  | 1 (2) |
| Encourages intuitive eating principles or practice (e.g. Promotes anti-diet, hunger and fullness, food enjoyment, body respect)                                                         | 27 (43) | 26 (41) | 3 (5)  | 2 (3) | 4 (6)  | 1 (2) |
| Increasing awareness of hunger/ fullness/ satiety                                                                                                                                       | 25 (40) | 29 (46) | 4 (6)  | 2 (3) | 3 (5)  | 0 (0) |

**Table S2.4. Category 4: Movement and sleep related strategies**

| <b>Physical activity education (n=55)</b>                                                              |                                                        |                                         |                                          |                                         |                                                        |                 |
|--------------------------------------------------------------------------------------------------------|--------------------------------------------------------|-----------------------------------------|------------------------------------------|-----------------------------------------|--------------------------------------------------------|-----------------|
|                                                                                                        | <b>N (%)</b>                                           |                                         |                                          |                                         |                                                        |                 |
|                                                                                                        | <b>Very likely to decrease risk of eating disorder</b> | <b>Somewhat likely to decrease risk</b> | <b>No impact on eating disorder risk</b> | <b>Somewhat likely to increase risk</b> | <b>Very likely to increase risk of eating disorder</b> | <b>Not sure</b> |
| Education to increase physical activity (e.g. staged introduction of activity, suggested activities)   | 5 (9)                                                  | 18 (33)                                 | 13 (24)                                  | 12 (22)                                 | 5 (9)                                                  | 2 (4)           |
| Promotes joyful movement and activity                                                                  | 16 (29)                                                | 29 (53)                                 | 2 (4)                                    | 4 (7)                                   | 3 (6)                                                  | 1 (2)           |
| Encourages strict/ formal activity plan (e.g. gym program)                                             | 1 (2)                                                  | 4 (7)                                   | 5 (9)                                    | 26 (47)                                 | 18 (33)                                                | 1 (2)           |
| Education on Non Exercise Activity Thermogenesis (NEAT) (energy expended during tasks of daily living) | 3 (6)                                                  | 19 (35)                                 | 10 (18)                                  | 8 (15)                                  | 7 (13)                                                 | 8 (15)          |
| Provides cultural adaptations relating to physical activity                                            | 11 (20)                                                | 23 (42)                                 | 13 (24)                                  | 2 (4)                                   | 4 (7)                                                  | 2 (4)           |

|                                                                                                                                                                     |         |         |         |         |         |         |
|---------------------------------------------------------------------------------------------------------------------------------------------------------------------|---------|---------|---------|---------|---------|---------|
| <b>Physical activity prescription (n=55)</b>                                                                                                                        |         |         |         |         |         |         |
| Provides a prescriptive exercise plan                                                                                                                               | 3 (6)   | 4 (7)   | 4 (7)   | 22 (40) | 18 (33) | 4 (7)   |
| Provides flexible exercise plan (e.g. suggested activities, encouraging choice)                                                                                     | 7 (13)  | 31 (56) | 7 (13)  | 6 (11)  | 3 (6)   | 1 (2)   |
| Provides supervised group exercise classes/ program                                                                                                                 | 5 (9)   | 20 (36) | 10 (18) | 8 (15)  | 6 (11)  | 6 (11)  |
| Provides individual personal training                                                                                                                               | 4 (7)   | 12 (22) | 10 (18) | 12 (22) | 5 (9)   | 12 (22) |
| <b>Physical activity monitoring (n=55)</b>                                                                                                                          |         |         |         |         |         |         |
| Self-monitoring of activity (e.g. diary, pedometer)                                                                                                                 | 3 (6)   | 4 (7)   | 6 (11)  | 22 (40) | 15 (27) | 5 (9)   |
| External feedback on self-monitoring (e.g., feedback on exercise diary, step count)                                                                                 | 3 (6)   | 3 (6)   | 9 (16)  | 16 (29) | 17 (31) | 7 (13)  |
| <b>Behaviour change strategies related to physical activity (n=55)</b>                                                                                              |         |         |         |         |         |         |
| Encourage activity focused goals (including time, duration, mode) with/ without review                                                                              | 4 (7)   | 8 (15)  | 9 (16)  | 20 (36) | 9 (16)  | 5 (9)   |
| Increasing skills to undertake physical activity (e.g. demonstration of activity such as pictures/ videos/ live demos, help with scheduling/ planning for activity) | 6 (11)  | 13 (24) | 16 (29) | 6 (11)  | 6 (11)  | 8 (15)  |
| Feedback on physical activity behaviours and/ or change in fitness                                                                                                  | 7 (13)  | 12 (22) | 13 (24) | 10 (18) | 9 (16)  | 4 (7)   |
| Problem solving barriers to physical activity                                                                                                                       | 8 (15)  | 22 (40) | 13 (24) | 3 (6)   | 5 (9)   | 4 (7)   |
| <b>Addressing sedentary time (n=54)</b>                                                                                                                             |         |         |         |         |         |         |
| Education to reduce/ limit sedentary time (e.g. screen time)                                                                                                        | 2 (4)   | 10 (19) | 22 (41) | 10 (19) | 8 (15)  | 2 (4)   |
| Sedentary time focused goals (time, duration, mode) with/ without review                                                                                            | 2 (4)   | 11 (20) | 17 (32) | 13 (24) | 7 (13)  | 4 (7)   |
| Encourages self-monitoring of sedentary time (e.g. screen time monitoring, setting app limits, reminders to stand)                                                  | 3 (6)   | 6 (11)  | 19 (35) | 13 (24) | 10 (19) | 3 (6)   |
| Problem solving barriers to reducing sedentary time                                                                                                                 | 5 (9)   | 14 (26) | 20 (37) | 7 (13)  | 5 (9)   | 3 (6)   |
| <b>Addressing sleep health (n=54)</b>                                                                                                                               |         |         |         |         |         |         |
| Promotes regular sleep routine                                                                                                                                      | 12 (22) | 25 (46) | 12 (22) | 0 (0)   | 3 (6)   | 2 (4)   |
| Promotes positive sleep environment (e.g. limit screen time before bed)                                                                                             | 9 (17)  | 27 (50) | 13 (24) | 0 (0)   | 3 (6)   | 2 (4)   |

**Table S2.5. Category 5: Psychosocial health related strategies**

| Psychological framework or theory (n=55)                                        |                                                 |                                  |                                   |                                  |                                                 |          |
|---------------------------------------------------------------------------------|-------------------------------------------------|----------------------------------|-----------------------------------|----------------------------------|-------------------------------------------------|----------|
|                                                                                 | N (%)                                           |                                  |                                   |                                  |                                                 |          |
|                                                                                 | Very likely to decrease risk of eating disorder | Somewhat likely to decrease risk | No impact on eating disorder risk | Somewhat likely to increase risk | Very likely to increase risk of eating disorder | Not sure |
| Intervention is informed by a psychological framework or theory                 | 9 (16)                                          | 22 (40)                          | 6 (11)                            | 0 (0)                            | 8 (15)                                          | 10 (18)  |
| Intervention is based on Cognitive behaviour therapy (CBT)                      | 6 (11)                                          | 29 (53)                          | 4 (7)                             | 3 (6)                            | 8 (15)                                          | 5 (9)    |
| Intervention is based on Enhanced Cognitive Behaviour Therapy (CBT-E)           | 11 (20)                                         | 25 (46)                          | 2 (4)                             | 2 (4)                            | 8 (15)                                          | 7 (13)   |
| Intervention is based on Acceptance and Commitment therapy (ACT)                | 10 (18)                                         | 24 (44)                          | 5 (9)                             | 1 (2)                            | 7 (13)                                          | 8 (15)   |
| Intervention is based on Dialectical Behaviour Therapy (DBT)                    | 7 (13)                                          | 23 (42)                          | 5 (9)                             | 1 (2)                            | 7 (13)                                          | 12 (22)  |
| Intervention is based on Family-Based Treatment                                 | 7 (13)                                          | 30 (55)                          | 2 (4)                             | 1 (2)                            | 8 (15)                                          | 7 (13)   |
| Intervention is based on Interpersonal Therapy (IPT) for binge eating           | 6 (11)                                          | 23 (42)                          | 2 (4)                             | 1 (2)                            | 8 (15)                                          | 15 (27)  |
| Intervention is based on Trauma-informed care                                   | 12 (22)                                         | 29 (53)                          | 4 (7)                             | 1 (2)                            | 5 (10)                                          | 4 (7)    |
| Intervention is based on Compassion focussed therapy                            | 10 (18)                                         | 26 (47)                          | 5 (9)                             | 1 (2)                            | 7 (13)                                          | 6 (11)   |
| Intervention uses Motivational interviewing                                     | 6 (11)                                          | 26 (47)                          | 9 (16)                            | 1 (2)                            | 8 (15)                                          | 5 (9)    |
| <b>Addresses mental health conditions e.g. depression, anxiety, PTSD (n=55)</b> |                                                 |                                  |                                   |                                  |                                                 |          |
| Identifies mental health condition                                              | 10 (18)                                         | 25 (46)                          | 11 (20)                           | 2 (4)                            | 4 (7)                                           | 3 (6)    |
| Provides referral for psychological support                                     | 22 (40)                                         | 21 (38)                          | 5 (9)                             | 1 (2)                            | 5 (9)                                           | 1 (2)    |
| Addresses mental health condition within the intervention                       | 19 (35)                                         | 23 (42)                          | 6 (11)                            | 1 (2)                            | 5 (9)                                           | 1 (2)    |
| Addresses self-esteem                                                           | 19 (35)                                         | 24 (44)                          | 7 (13)                            | 1 (2)                            | 4 (7)                                           | 0 (0)    |
| <b>Addresses body image (n=55)</b>                                              |                                                 |                                  |                                   |                                  |                                                 |          |
| Addresses body image concerns                                                   | 18 (33)                                         | 25 (46)                          | 4 (7)                             | 2 (4)                            | 4 (7)                                           | 2 (4)    |
| Education on the role of social media (e.g. media literacy training)            | 15 (27)                                         | 28 (51)                          | 3 (6)                             | 1 (2)                            | 5 (9)                                           | 3 (6)    |
| Promotes body compassion/ acceptance/ positivity                                | 21 (38)                                         | 21 (38)                          | 4 (7)                             | 2 (4)                            | 5 (9)                                           | 2 (4)    |
| <b>Addresses weight stigma (n=55)</b>                                           |                                                 |                                  |                                   |                                  |                                                 |          |

|                                                                                                                                                                    |         |         |         |       |       |        |
|--------------------------------------------------------------------------------------------------------------------------------------------------------------------|---------|---------|---------|-------|-------|--------|
| Education and/ or strategies to increase resilience to weight stigma, bullying, teasing                                                                            | 16 (29) | 21 (38) | 10 (18) | 1 (2) | 4 (7) | 3 (6)  |
| Addresses weight-focused communication skills (e.g. how to communicate with peers/ family about weight, how to address weight-related comments from peers/ family) | 18 (33) | 22 (40) | 8 (15)  | 0 (0) | 4 (7) | 3 (6)  |
| <b>Psychosocial health related monitoring (n=55)</b>                                                                                                               |         |         |         |       |       |        |
| Self-monitoring of thoughts, feelings, mood (e.g. mood diary)                                                                                                      | 7 (13)  | 29 (53) | 12 (22) | 2 (4) | 3 (6) | 2 (4)  |
| Review/feedback on self-monitoring (e.g. mood diary)                                                                                                               | 7 (13)  | 30 (55) | 11 (20) | 0 (0) | 4 (7) | 3 (6)  |
| Encourages self-assessment of overall wellbeing (e.g. reflective practice)                                                                                         | 12 (22) | 30 (55) | 5 (9)   | 1 (2) | 5 (9) | 2 (4)  |
| <b>Behaviour change strategies related to psychosocial issues (n=55)</b>                                                                                           |         |         |         |       |       |        |
| Encourages psychosocial health related goals with/ without review                                                                                                  | 6 (11)  | 31 (57) | 4 (7)   | 2 (4) | 5 (9) | 7 (13) |
| Increases skills to manage psychosocial health (e.g. stress management)                                                                                            | 15 (27) | 29 (53) | 4 (7)   | 1 (2) | 4 (7) | 2 (4)  |
| Inclusion of peer/ social support strategies                                                                                                                       | 13 (24) | 29 (53) | 5 (9)   | 0 (0) | 5 (9) | 3 (6)  |

**Table S3: Delivery Features (n=67)**

| Delivery Feature                                                                                                                                                                                 | N (%)         |           |         |
|--------------------------------------------------------------------------------------------------------------------------------------------------------------------------------------------------|---------------|-----------|---------|
|                                                                                                                                                                                                  | Not important | Important | Unsure  |
| Who delivered the intervention, including profession, training and qualifications                                                                                                                | 9 (13)        | 54 (81)   | 4 (6)   |
| Setting of the intervention e.g. primary care, hospital, community                                                                                                                               | 22 (33)       | 35 (52)   | 10 (15) |
| Mode of delivery e.g. Face-to-face, online, SMS, telehealth                                                                                                                                      | 19 (28)       | 33 (49)   | 15 (22) |
| Target population/ recipient of the intervention e.g. group or individual intervention, whether intervention is delivered to individual alone or with support person such as a partner or parent | 10 (15)       | 44 (66)   | 13 (19) |
| Support provided during the intervention e.g. Frequency and duration of contact with intervention personnel                                                                                      | 5 (8)         | 55 (82)   | 7 (10)  |
